# Supplementary material
Source: HighWire-hosted journal article supplement (https://jcp.bmj.com/content/75/6/365)
Supplement: inline-supplementary-material-1 [file inline-supplementary-material-1.pdf]

**Supplementary Table (S1)- Common current markers of proliferation (advantages and Limitations).**

|                                 | <b>Marker</b>                                                                   | <b>Advantages</b>                                                                         | <b>Limitations</b>                                                                                                                                 |
|---------------------------------|---------------------------------------------------------------------------------|-------------------------------------------------------------------------------------------|----------------------------------------------------------------------------------------------------------------------------------------------------|
| <b>Immunohistochemistry</b>     | <b>Ki67</b>                                                                     | Prognostically significant in invasive BC.                                                | Field selection and stain intensities disagreement.<br>Suboptimal reproducibility.<br>Assesses all cells entering the cell cycle not only mitoses. |
|                                 | <b>PHH3</b>                                                                     | High specificity to mitotic cells                                                         | Clinical utility is still under investigation.                                                                                                     |
|                                 | <b>Ki-S1</b>                                                                    | Identifies a cell cycle associated antigen.                                               | No prognostic results.                                                                                                                             |
|                                 | <b>Topoisomerase IIa</b>                                                        | Marker of cells ongoing division and similar to Ki67.                                     | Similar to Ki67                                                                                                                                    |
|                                 | <b>Cycline A</b>                                                                | Expressed in the late cell cycle phases S, G2, and M.<br>Has prognostic importance in BC. | Similar to Ki67                                                                                                                                    |
|                                 | <b>Nuclear antigen proliferating cells (PCNA)</b>                               | Targets the S phase of the cell cycle.                                                    | No prognostic results.                                                                                                                             |
|                                 | <b>Geminin</b>                                                                  | Correlated with cell proliferation.                                                       | No prognostic results.                                                                                                                             |
|                                 | <b>Minichromosomemaintenance (McM)</b>                                          | Involved in the control of DNA replication                                                | No prognostic results.                                                                                                                             |
| <b>Stains</b>                   | <b>Crystal violet, Toluidine blue, Giemsa stain and fluorescent microscopy.</b> | Image chromosome division figures (CDFs), and atypical and normal mitotic figures.        |                                                                                                                                                    |
| <b>Flow cytometry</b>           | <b>Cytometric phase S fraction</b>                                              | Prognostically significant.                                                               | Use fresh / frozen material                                                                                                                        |
| <b>Cell cycle time</b>          | <b>Argyrophilic nuclear organiser regions in Ki67 positive cells</b>            | Prognostically significant                                                                | Difficult to evaluate                                                                                                                              |
| <b>Incorporation techniques</b> | <b>Thymidine labelling index</b>                                                | Prognostically significant.                                                               | Prognostic significance similar to Ki67 and MAI.                                                                                                   |
|                                 | <b>Bromodeoxyuridine (BrdU) and tritiated thymidine labelling index</b>         | Prognostically significant.                                                               | Use fresh material, Intravenous treatment and/or includes radioactivity                                                                            |



**Supplementary Table (S2)- Morphological features of mitoses.**

| <i>Phases of mitosis</i>   | <i>Nucleus</i>          |                          |                                                                                                                                                                                                                                     |                      |             | <i>Cytoplasm</i>                                                            |                                      |                                                                 |                                         |
|----------------------------|-------------------------|--------------------------|-------------------------------------------------------------------------------------------------------------------------------------------------------------------------------------------------------------------------------------|----------------------|-------------|-----------------------------------------------------------------------------|--------------------------------------|-----------------------------------------------------------------|-----------------------------------------|
|                            | <i>Nuclear membrane</i> | <i>Hairy projections</i> | <i>Shape</i>                                                                                                                                                                                                                        | <i>Colour</i>        | <i>Size</i> | <i>Chromatin homogeneity</i>                                                | <i>Cytoplasm present or not seen</i> | <i>Cytoplasmic colour</i>                                       | <i>Cell membrane</i>                    |
| <b><i>Prophase</i></b>     | Intact nuclear membrane | Absent                   | Round to oval<br>Absent nucleolus                                                                                                                                                                                                   | Intensely basophilic | No increase | Chromatin condenses into chromosomes that are coarse clumps of similar size | Present                              | Abundant granular slightly eosinophilic or basophilic cytoplasm | Intact cell membrane                    |
| <b><i>Prometaphase</i></b> | Absent                  | Present                  | Round to oval<br>Absent nucleolus                                                                                                                                                                                                   | Intensely basophilic | No increase | Condensed chromatin                                                         | Present                              | Abundant granular slightly eosinophilic or basophilic cytoplasm | Intact cell membrane                    |
| <b><i>Metaphase</i></b>    | Absent                  | Present                  | The metaphase plate may be:<br>- linear and perpendicular to the long axis of the spindle apparatus<br>- parallel to the axis with chromosomes in a ring or round layer<br>- “ring metaphase” forms can be seen<br>Absent nucleolus | Intensely basophilic | No increase | Condensed chromatin                                                         | Present                              | Abundant granular slightly eosinophilic or basophilic cytoplasm | Intact cell membrane                    |
| <b><i>Anaphase</i></b>     | Absent                  | Present                  | 2 uniform groups of dark chromatins are being pulled away from each other<br>Absent nucleolus                                                                                                                                       | Intensely basophilic | No increase | Condensed chromatin                                                         | Present                              | Abundant granular slightly eosinophilic or basophilic cytoplasm | Intact cell membrane                    |
| <b><i>Telophase</i></b>    | Absent                  | Present                  | Nuclear envelope forms around 2 uniformly sized separate clusters of chromosomes<br>Nucleolus reforms                                                                                                                               | Intensely basophilic | No increase | Chromatin de-condensation                                                   | Present                              | Abundant granular slightly eosinophilic or basophilic cytoplasm | Cell membrane separates the 2 new cells |

**Supplementary Table (S3)** - Comparison between mitotic and apoptotic figures in routinely stained haematoxylin and eosin slides.

| <b>Criteria</b>         | <b>Mitosis</b>                                                            | <b>Apoptosis</b>                                                                                                                                     |
|-------------------------|---------------------------------------------------------------------------|------------------------------------------------------------------------------------------------------------------------------------------------------|
| <b>Cell size</b>        | A slight increase in size.                                                | Reduced cell size.                                                                                                                                   |
| <b>Chromatin</b>        | Condensed chromatin                                                       | Pyknosis (small condensed nuclei) – karyorrhexis (nuclear fragmentation) – karyolysis (dissolved nuclear material) and formation of apoptotic bodies |
| <b>Nuclear membrane</b> | Absent nuclear membrane<br>Hairy projections of the nuclear material.     | Intact nuclear membrane.<br>No hairy projection of nuclear material.                                                                                 |
| <b>Cytoplasm</b>        | Abundant, slightly eosinophilic granular cytoplasm.                       | Densely eosinophilic cytoplasm                                                                                                                       |
| <b>Cell membrane</b>    | Intact; separates only during telophase resulting into two daughter cells | Intact; altered structure.<br>Loss of cell to cell contact; blebbing, cytoplasmic buds, and formation of apoptotic bodies at late stages.            |

**Supplementary Figure (S4)**-Photomicrograph showing different mitotic figures and mimickers (H&E) using WSIs at 40x magnification.

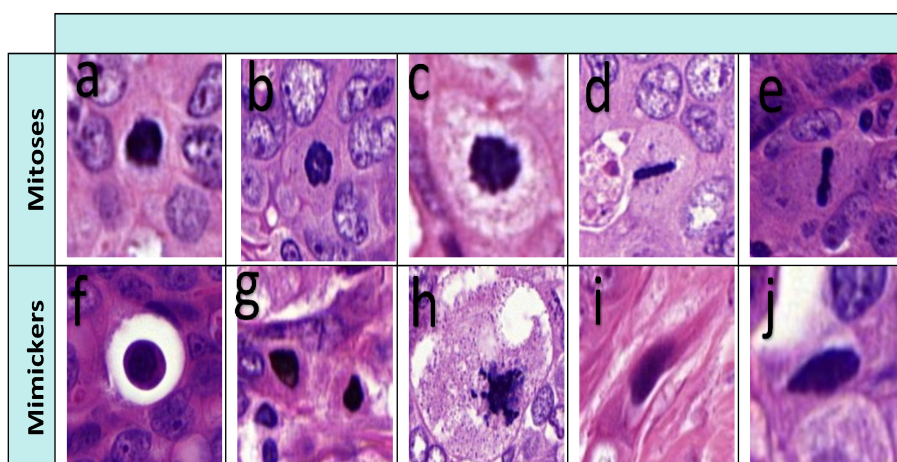

- **(a-e):** Mitotic Figures (H&E) showing mitotic figures in prophase and metaphase.
- **(f-j):** Mimickers (H&E).
- **(f):** Apoptotic figure, **(g)** Pigments, **(h)** Karyolytic cell, **(i)** Compressed elongated hyperchromatic cells, **(j)** Hyperchromatic cell.
